# Supplementary material for: Fast pseudocapacitive reactions of three-dimensional manganese dioxide structures synthesized via self-limited redox deposition on microwave-expanded graphite oxide
Source: Royal Society of Chemistry journal article supplement (doi:10.1039/c5ra24104a), 2016-01-01
Supplement: c5ra24104a1.pdf [file c5ra24104a1.pdf]

## Supporting Information

### **Fast pseudocapacitive reactions of three-dimensional manganese dioxide structures synthesized *via* self-limited redox deposition on microwave-expanded graphite oxide**

Wencong Zeng,<sup>a</sup> Yuan Zhao,<sup>a</sup> Kun Ni,<sup>a</sup> Yanwu Zhu<sup>a,b,\*</sup>

<sup>a</sup> *Key Laboratory of Materials for Energy Conversion, Chinese Academy of Sciences,*

*Department of Materials Science and Engineering, University of Science and*

*Technology of China, Hefei, Anhui 230026, P. R. China*

<sup>b</sup> *iChEM (Collaborative Innovation Center of Chemistry for Energy Materials),*

*University of Science and Technology of China, Hefei, Anhui 230026, P. R. China*

---

\*Corresponding author. E-mail address: [zhuyanwu@ustc.edu.cn](mailto:zhuyanwu@ustc.edu.cn)

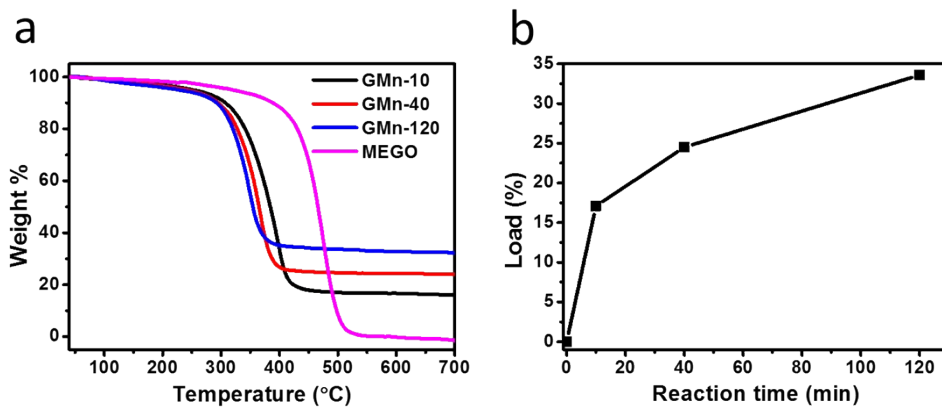

**Fig. S1** (a) Thermogravimetric analysis of MEGO and MEGO–MnO<sub>2</sub> composites. (b) MnO<sub>2</sub> loading dependence on reaction duration.

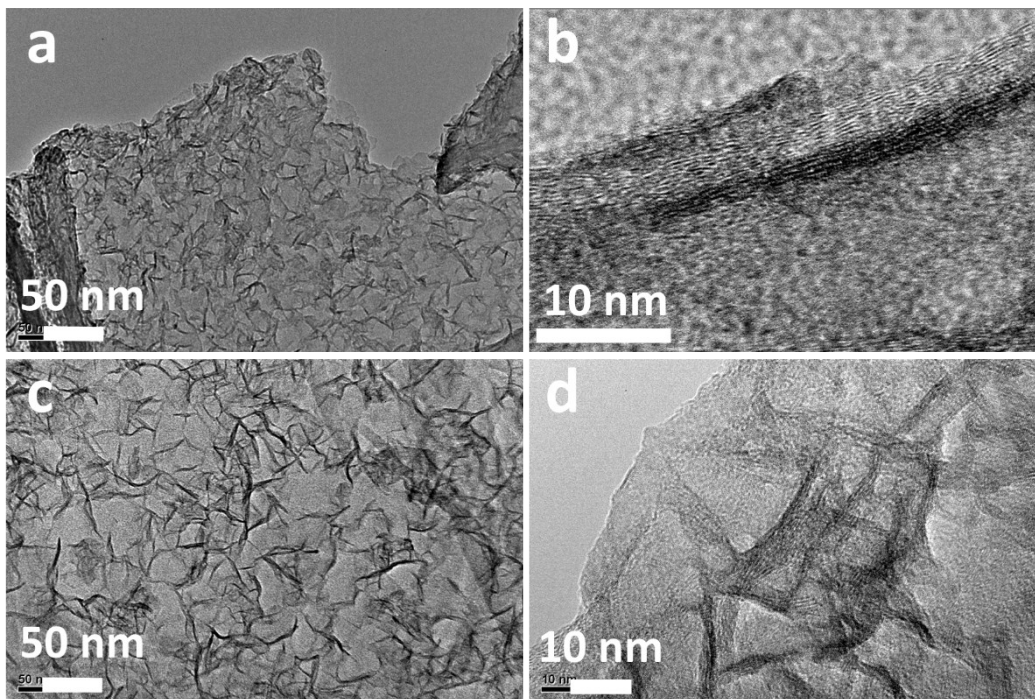

**Fig. S2** TEM images of (a, b) GMn-10 and (c, d) GMn-120.

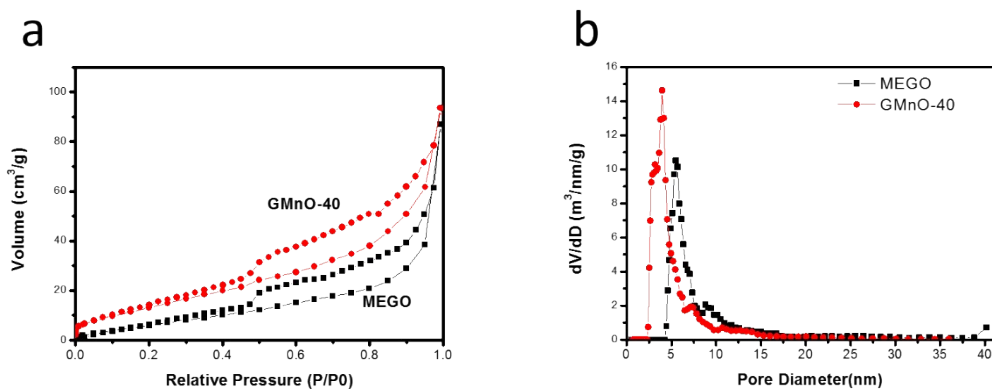

**Fig. S3** (a) Nitrogen adsorption and desorption isotherms of MEGO and GMn-40. (b) Pore size distributions of MEGO and GMn-40.

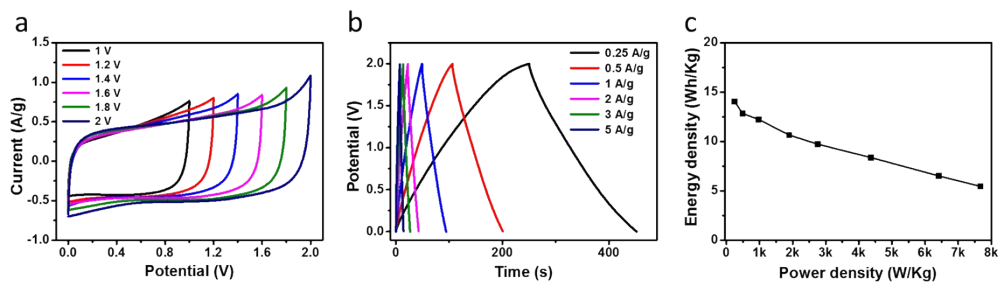

**Fig. S4** (a) CV curves of a GMn-40 symmetric SC measured in various potential windows at a scan rate of 20 mV/s. (b) Galvanostatic charge–discharge curves obtained at various current densities. (c) Energy density versus power density for symmetric SCs based on GMn-40.

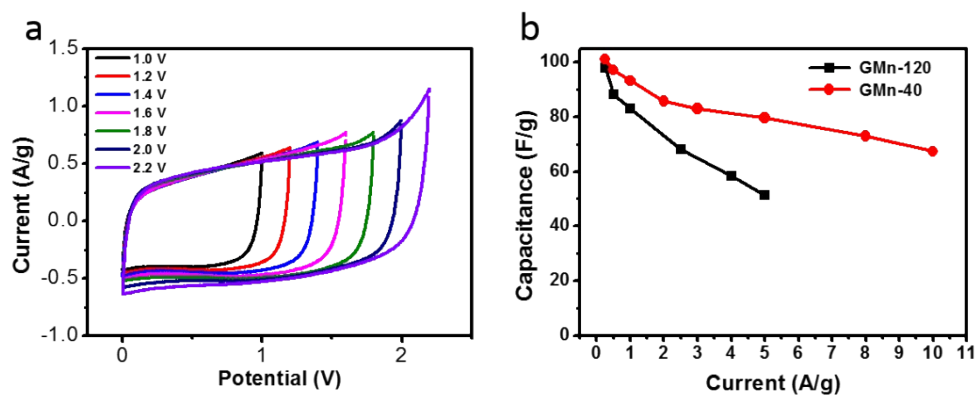

**Fig. S5** (a) CV curves of a GMn-120 symmetric SC measured in various potential windows at a scan rate of 20 mV/s. It shows that the operating voltage of the SC was limited to  $\sim 2$  V. (b) Specific capacitance of GMn-40 and GMn-120 symmetric SCs versus charge–discharge current density at a working potential of 2 V.

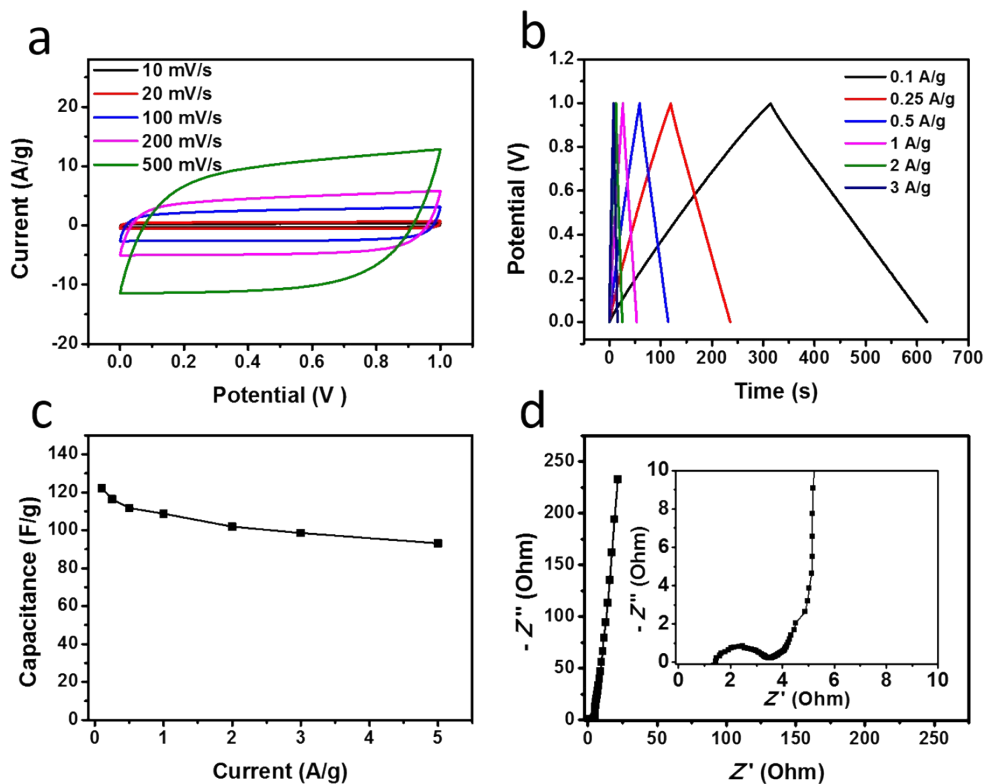

**Fig. S6** (a) CV curves of an aMEGO symmetric SC in 1 M Na<sub>2</sub>SO<sub>4</sub>, measured at various scan rates. (b) Galvanostatic charge–discharge curves at different current densities. (c) Specific capacitances calculated from discharge curves. (d) Nyquist plot.

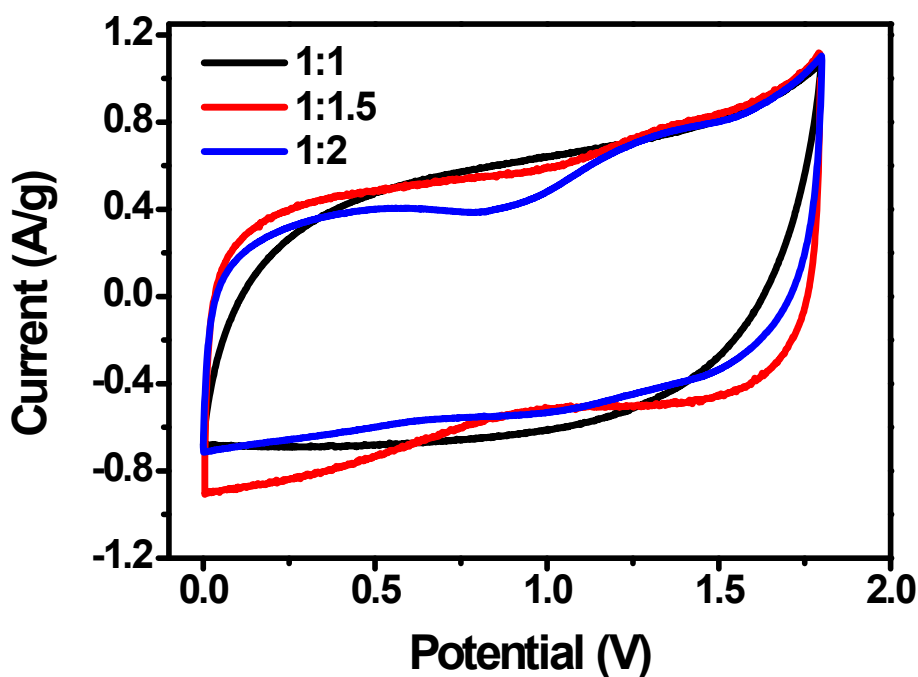

**Fig. S7** CV curves of GMn-40//aMEGO asymmetric supercapacitors (with different mass ratios between the positive and negative electrodes) at 20 mV/s. The specific capacitance was 26, 29.3, and 24.9 F/g for an asymmetric SC with a mass ratio of 1:1, 1:1.5, and 1:2, respectively. These values were calculated from CV curves according to the equation  $C_{cell} = (\int I dV)/(2vmV)$ , where  $C_{cell}$  is the specific capacitance of an asymmetric SC (F/g),  $I$  is the response current (A),  $V$  is the potential (V),  $v$  is the scan rate (V/s), and  $m$  is the mass of two electrodes (g).



---

**Table S1**  $I_D/I_G$  of MEGO and MEGO–MnO<sub>2</sub> composites calculated from Raman spectra.

|         | Position (cm <sup>-1</sup> ) |        | Intensity (arb. unit) |        | $I_D/I_G$ |
|---------|------------------------------|--------|-----------------------|--------|-----------|
|         | D band                       | G band | D band                | G band |           |
| MEGO    | 1362                         | 1593   | 1883                  | 1967   | 0.957     |
| GMn-10  | 1356                         | 1597   | 2475                  | 2675   | 0.926     |
| GMn-40  | 1350                         | 1599   | 2426                  | 2565   | 0.946     |
| GMn-120 | 1357                         | 1593   | 2165                  | 2309   | 0.938     |

**Table S2.** Comparison of capacitive performance of the supercapacitors based on various MnO<sub>2</sub>-based asymmetric presented in literature and the present work.

| Supercapacitors structure                                       | Method                                   | Electrolyte                                               | Operation voltage [V] | E(Wh/kg) | Ref       |
|-----------------------------------------------------------------|------------------------------------------|-----------------------------------------------------------|-----------------------|----------|-----------|
| MnO <sub>2</sub> -carbon paper// MnO <sub>2</sub> -carbon paper | Chemical precipitation                   | 1.0 M Na <sub>2</sub> SO <sub>4</sub> aqueous electrolyte | 0.7 V                 | 20.8     | [1]       |
| MnO <sub>2</sub> Nanotubes//AG                                  | Chemical precipitation                   | 1 M Na <sub>2</sub> SO <sub>4</sub>                       | 1.8 V                 | 22.5     | [2]       |
| CuO@MnO <sub>2</sub> //MEGO                                     | Chemical precipitation                   | 1 M Na <sub>2</sub> SO <sub>4</sub>                       | 1.8 V                 | 22.1     | [3]       |
| Graphene-Patched CNT-MnO <sub>2</sub> //CNT-PANI                | Galvanostatic electrochemical deposition | 1 M Na <sub>2</sub> SO <sub>4</sub> - PVP gel             | 1.6 V                 | 24.8     | [4]       |
| GMN-40//aMEGO                                                   | Chemical precipitation                   | 1 M Na <sub>2</sub> SO <sub>4</sub>                       | 1.8 V                 | 25.1     | This work |

References:

- 1 S. J. He, C. X. Hu, H. Q. Hou and W. Chen, *J. Power Sources*, 2014, **246**, 754.
- 2 M. Huang, Y. X. Zhang, F. Li, L. L. Zhang, R. S. Ruoff, Z. Y. Wen and Q. Liu, *Sci. Rep.*, 2014, **4**; DOI:10.1038/srep03878.
- 3 M. Huang, Y. X. Zhang, F. Li, Z. C. Wang, Alamusi, N. Hu, Z. Y. Wen and Q. Liu, *Sci. Rep.*, 2014, **4**; DOI:10.1038/srep04518.
- 4 Y. Jin, H. Y. Chen, M. H. Chen, N. Liu and Q. W. Li, *ACS Appl. Mater. Interfaces*, 2013, **5**, 3408.
